# Supplementary material
Source: HighWire-hosted journal article supplement (https://bmjopen.bmj.com/content/8/11/e021465)
Supplement: inline-supplementary-material-4 [file inline-supplementary-material-4.pdf]

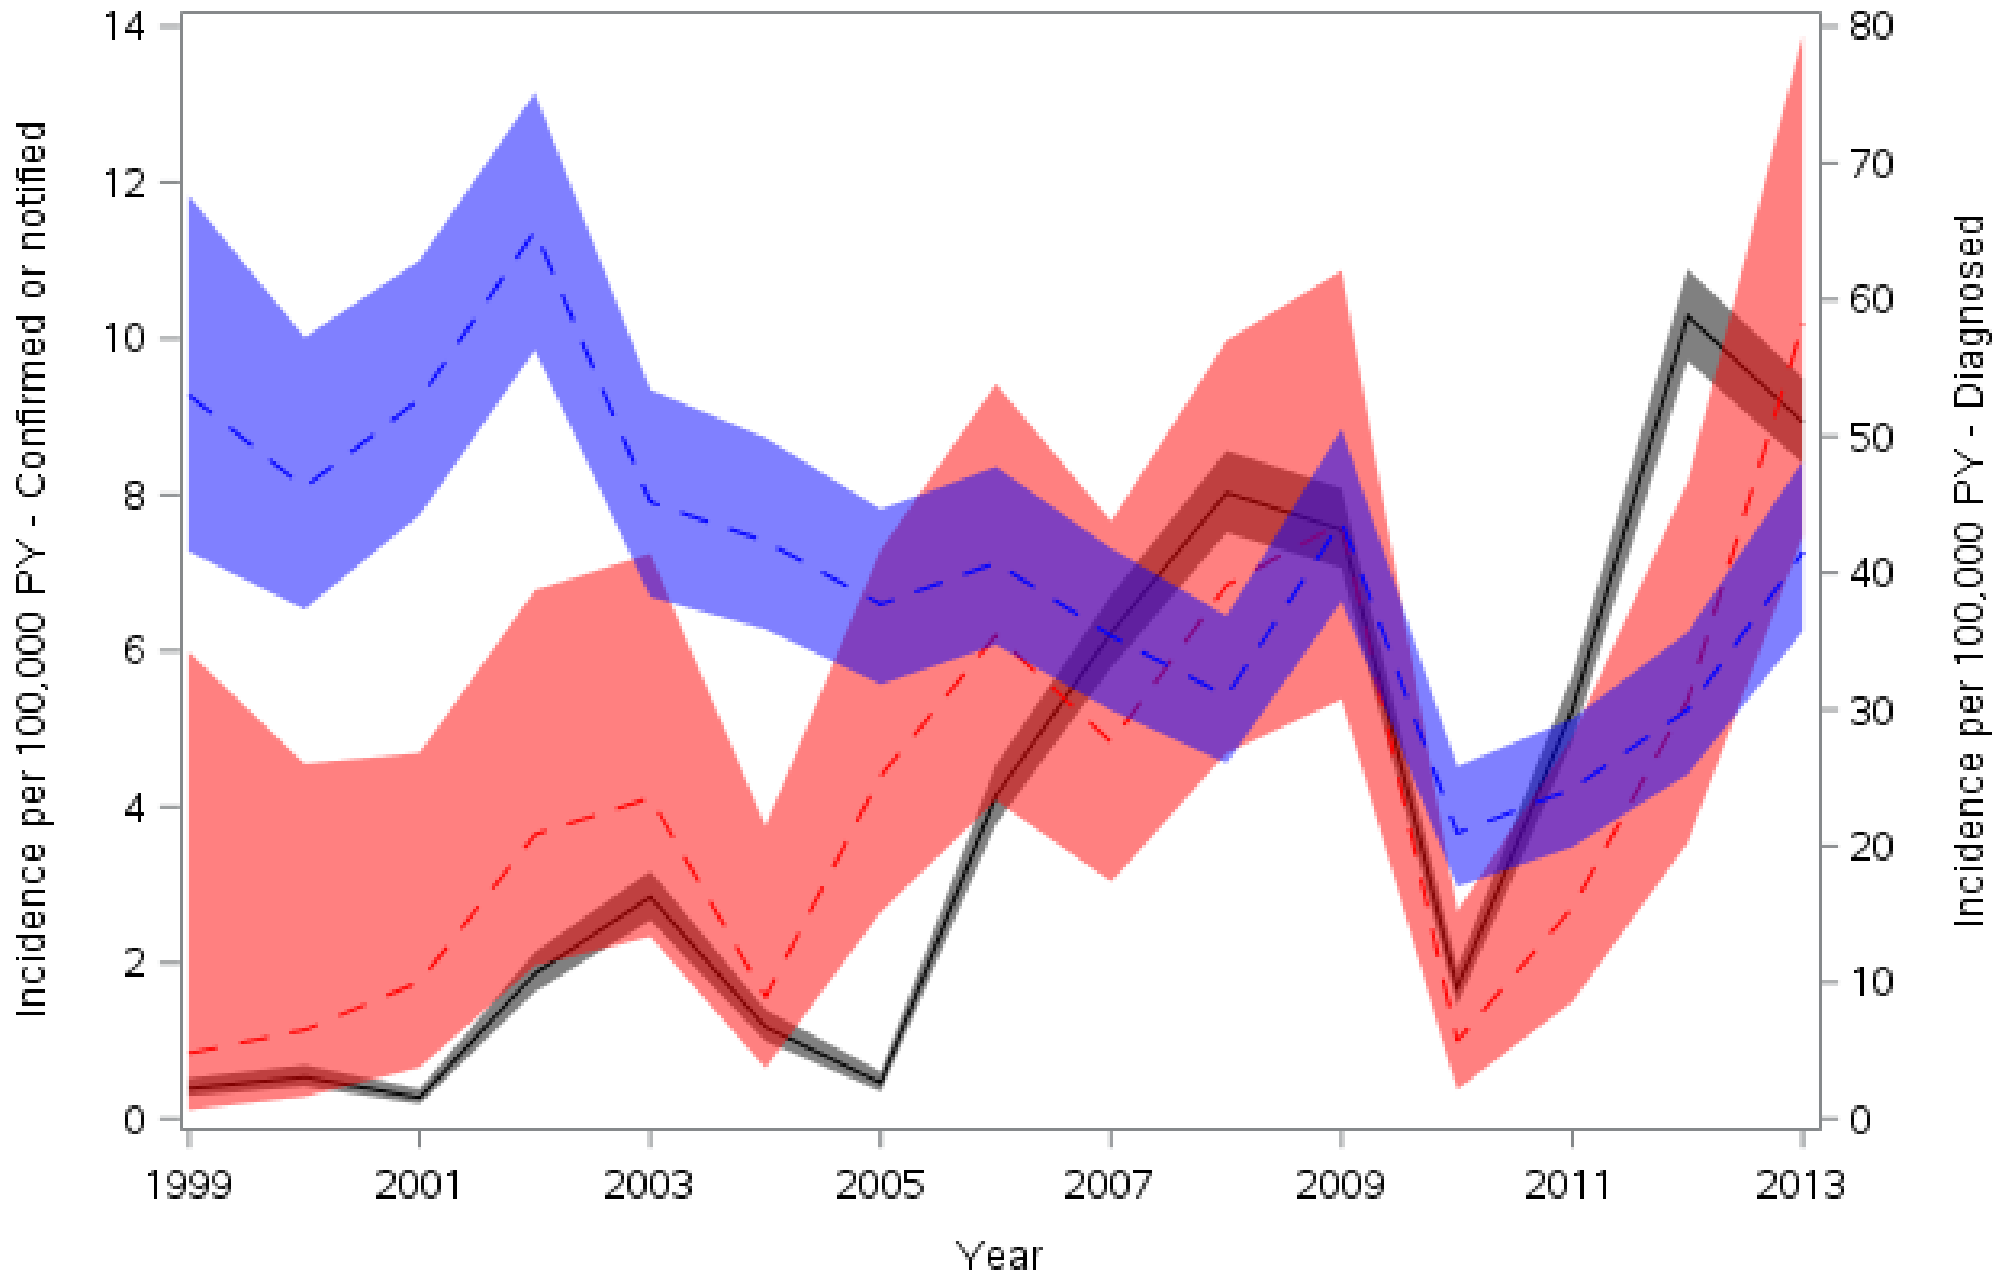

— Incidence of confirmed measles in England & Wales  
 - - - Incidence of measles notifications in THIN  
 - - - Incidence of measles diagnoses in THIN
