# Supplementary material
Source: HighWire-hosted journal article supplement (https://bmjopen.bmj.com/content/8/11/e021465)
Supplement: inline-supplementary-material-6 [file inline-supplementary-material-6.pdf]

**S6 Table.** Hazard Ratio of measles versus non-measles, for outcomes first infection and first prescription.

| <b>Outcome</b>               | <b>Hazard Ratio (95% Confidence Interval)</b> | <b>P-value</b> |
|------------------------------|-----------------------------------------------|----------------|
| Infections                   | 1.20* (1.13 to 1.28)                          | <0.0001        |
| Anti-infective prescriptions | 1.24** (1.18 to 1.31)                         | <0.0001        |

\*Controlled for number of diagnosed infections in the year prior to index and number of consultations in the previous year.

\*\*Controlled for history of respiratory illness, number of anti-infective prescriptions in the year prior to index, and number of consultations in the year prior to index categorized by quintiles
